# Supplementary material for: Effects of ipragliflozin on glycemic control, appetite and its related hormones: A prospective, multicenter, open‐label study (SOAR‐KOBE Study)
Source: PubMed Central journal article supplement — J Diabetes Investig. 2019 Mar 28;10(5):1254–61. doi: 10.1111/jdi.13015 (PMC6717805; doi:10.1111/jdi.13015), 2019-03-28

Figure S1. (A) Time course of body weight during treatment with ipragliflozin. Data are means  $\pm$  SD ( $n = 92$ ).  $^{**}P < 0.01$  versus baseline (time 0) by one-way analysis of variance. Where the number of patients differed from the number of patients in the full analysis set, the number is given in parentheses. (B) Correlation between changes in glycated hemoglobin (HbA<sub>1c</sub>) level and body weight from baseline to 16 weeks after the onset of ipragliflozin treatment ( $n = 95$ ). Where the number of patients differed from the number of patients in the full analysis set, the number is given in parentheses. (C) Correlation analysis for changes in the VAS score for hunger and the serum leptin concentration corrected by body weight between baseline and 2 weeks after the onset of ipragliflozin treatment ( $n = 92$ ). Where the number of patients differed from the number of patients in the full analysis set, the number is given in parentheses.

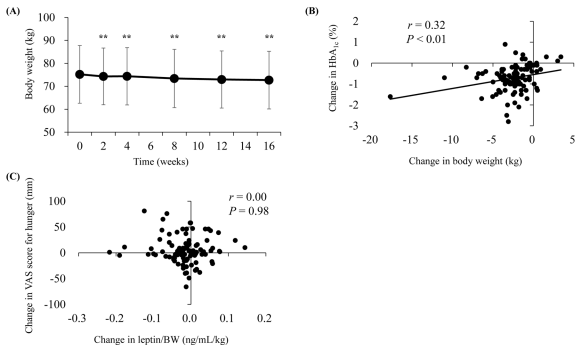

Supplement: JDI-10-1254-s001.pdf [file JDI-10-1254-s001.pdf]
