# Supplementary material for: Effects of ipragliflozin on glycemic control, appetite and its related hormones: A prospective, multicenter, open‐label study (SOAR‐KOBE Study)
Source: PubMed Central journal article supplement — J Diabetes Investig. 2019 Mar 28;10(5):1254–61. doi: 10.1111/jdi.13015 (PMC6717805; doi:10.1111/jdi.13015), 2019-03-28

**Figure S2. Time course of plasma active ghrelin concentration (n= 64) during treatment with ipragliflozin. Data are means  $\pm$  SD. Where the number of patients differed from the number of patients in the full analysis set, the number is given in parentheses.**

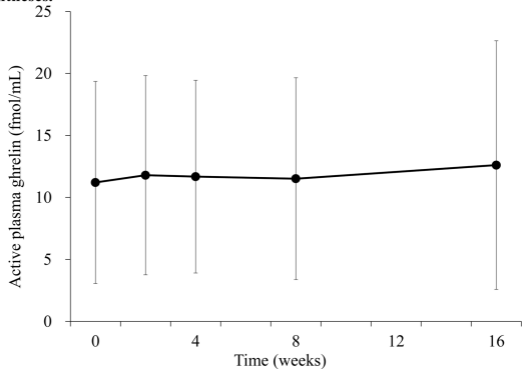

Supplement: JDI-10-1254-s002.pdf [file JDI-10-1254-s002.pdf]
